# Supplementary material
Source: PubMed Central journal article supplement (PMC5073124)
Supplement: 401_2016_1603_MOESM8_ESM.pdf [file 401_2016_1603_MOESM8_ESM.pdf]

**Table S1.** Association of TDP-43 and/or FMRP with AD and Schizophrenia

| <b>Diseases</b>             | <b>Facts</b>                                                                                                                                                       | <b>References</b>                      |
|-----------------------------|--------------------------------------------------------------------------------------------------------------------------------------------------------------------|----------------------------------------|
| Alzheimer's Disease<br>(AD) | TDP-43 pathology is detected in 25% to 50% of AD cases.                                                                                                            | [20]                                   |
|                             | FMRP induces dendritic spine shrinkage and loss that contribute to AD pathogenesis in conjunction with Rac1 and CYFIP1/2.                                          | [1]                                    |
|                             | FMRP-target genes, e.g. App etc. are involved in AD pathogenesis and disease severity. App is one of the target mRNAs of TDP-43.                                   | [18, 19]; Current MS (data not shown). |
| Schizophrenia               | Schizophrenia-like symptoms are associated with patients with FTD, and TDP-43 pathology has been depicted as one of the molecular mechanisms behind the psychosis. | [7]                                    |
|                             | FMRP pathology is present in schizophrenia patients with lower IQ and early onset of the disease phenotypes                                                        | [11]                                   |
|                             | Expression levels of FMRP target mRNAs including Rac1, App etc. are altered in a subpopulation of schizophrenia patients with or without known fmr1 gene mutations | [9]                                    |

**Table S2. Target mRNA databases of FMRP and TDP-43 used for identification of their putative common mRNA targets.**

|                | Reference | RNA source                                                                                             | Techniques/Approaches             | Number of target mRNAs included in the present analysis |
|----------------|-----------|--------------------------------------------------------------------------------------------------------|-----------------------------------|---------------------------------------------------------|
| FMRP targets   | [4]       | Mouse brain extract                                                                                    | RNA IP followed by microarray     | 232                                                     |
|                | [8]       | Mouse brain extract                                                                                    | CLIP-chip assay                   | 842                                                     |
|                | [5]       | Human brain tissue extract                                                                             | Modified cDNA-SELEX protocol      | 32                                                      |
|                | [13]      | Primary cultured mouse hippocampal cells                                                               | APRA followed by neuroarray       | 33                                                      |
|                | [2]       | HEK293 cells stably expressing HA-FMRP (shares 90% of brain mRNAs according to RNA sequencing dataset) | PAR-CLIP assay                    | 1,719                                                   |
| TDP-43 targets | [6]       | NSC-34 cells                                                                                           | RNA IP chip (microarray)          | 2,637                                                   |
|                | [14]      | Mouse brain extract                                                                                    | RNA IP chip (microarray)          | 1,839                                                   |
|                | [15]      | Mouse brain extract                                                                                    | CLIP microarray                   | 223                                                     |
|                | [16]      | Mouse brain extract                                                                                    | RNA IP followed by RNA sequencing | 3,694                                                   |
|                | [21]      | SHSY5Y cells                                                                                           | UV-CLIP assay                     | 68                                                      |

**Table S3.** List of putative common target mRNAs of FMRP and TDP-43 that encode genes related to neuronal structure and development.

| <b>Gene Symbol</b> | <b>Functional annotation</b>                                                   |
|--------------------|--------------------------------------------------------------------------------|
| ABL1               | non-receptor tyrosine protein kinase                                           |
| ACTR3              | actin and actin-related protein                                                |
| ADCY1              | adenylate cyclase, guanylate cyclase                                           |
| AGAP2              | nucleic acid binding, G-protein modulator                                      |
| AGRN               | receptor, extracellular matrix linker protein                                  |
| AKAP9              | chromatin/chromatin-binding protein, hydrolase, kinase modulator               |
| ALS2               | chromatin/chromatin-binding protein, guanyl-nucleotide exchange factor         |
| ANK1               | cytoskeletal protein                                                           |
| ANK2               | cytoskeletal protein                                                           |
| ANK3               | cytoskeletal protein                                                           |
| AP2A2              | transmembrane receptor regulatory/adaptor protein                              |
| AP2S1              | vesicle coat protein                                                           |
| APBB1              | signaling molecule                                                             |
| APC                |                                                                                |
| APOE               |                                                                                |
| APP                | signaling molecule                                                             |
| ARF4               | small GTPase                                                                   |
| ARHGAP35           | G-protein modulator                                                            |
| ARHGAP39           | cytoskeletal protein                                                           |
| ARHGEF11           | guanyl-nucleotide exchange factor                                              |
| ARHGEF12           | guanyl-nucleotide exchange factor                                              |
| ARHGEF7            | signaling molecule, guanyl-nucleotide exchange factor                          |
| ARPC2              |                                                                                |
| ARPC5              | actin family cytoskeletal protein                                              |
| ATG7               | transfer/carrier protein, ligase                                               |
| ATP2B2             | cation transporter, ion channel, hydrolase                                     |
| BRSK1              | non-receptor serine/threonine protein kinase                                   |
| BRSK2              | non-receptor serine/threonine protein kinase                                   |
| CACNA1A            | voltage-gated calcium channel, voltage-gated sodium channel, voltage-gated ion |
| CACNA1G            | voltage-gated calcium channel, voltage-gated sodium channel, voltage-gated ion |
| CACNA1I            | voltage-gated calcium channel, voltage-gated sodium channel, voltage-gated ion |
| CACNB1             | voltage-gated calcium channel, voltage-gated ion channel                       |
| CALM1              | calmodulin                                                                     |
| CAMK2A             | non-receptor serine/threonine protein kinase                                   |
| CAMK2B             | non-receptor serine/threonine protein kinase                                   |
| CAMSAP1            |                                                                                |
| CAPZB              | non-motor actin-binding protein                                                |
| CDK5R1             | kinase activator                                                               |
| CELSR2             | G-protein-coupled receptor, cadherin                                           |
| CELSR3             | G-protein-coupled receptor, cadherin                                           |
| CIT                | non-receptor serine/threonine protein kinase                                   |
| CLASP2             | structural protein                                                             |
| CLTA               | vesicle coat protein                                                           |

|          |                                                                            |
|----------|----------------------------------------------------------------------------|
| COBL     |                                                                            |
| DCLK1    | non-receptor serine/threonine protein kinase                               |
| DNM1     | hydrolase, small GTPase, microtubule family cytoskeletal protein           |
| DPYSL2   | hydrolase                                                                  |
| DSCAML1  | immunoglobulin receptor superfamily, protein phosphatase, immunoglobulin   |
| DYNLT1   | microtubule family cytoskeletal protein                                    |
| EPHA4    |                                                                            |
| EPHB6    |                                                                            |
| FRY      |                                                                            |
| FYN      | non-receptor tyrosine protein kinase                                       |
| GAS7     | membrane trafficking regulatory protein, actin family cytoskeletal protein |
| GRIA1    | ionotropic glutamate receptor                                              |
| GPM6A    | myelin protein                                                             |
| GRB2     |                                                                            |
| GRIN2A   | ionotropic glutamate receptor                                              |
| GRIN2B   | ionotropic glutamate receptor                                              |
| GRIN2C   | ionotropic glutamate receptor                                              |
| GSK3B    | non-receptor serine/threonine protein kinase                               |
| HSP90AA1 | Hsp90 family chaperone                                                     |
| HTT      |                                                                            |
| IFT20    |                                                                            |
| IGF1R    |                                                                            |
| IRS2     |                                                                            |
| ITGB1    | receptor, extracellular matrix glycoprotein, cell adhesion molecule        |
| ITSN1    | membrane traffic protein, G-protein modulator, calcium-binding protein     |
| JAK1     | non-receptor tyrosine protein kinase                                       |
| JAK2     | non-receptor tyrosine protein kinase                                       |
| JUN      | transcription factor, nucleic acid binding                                 |
| KALRN    | signaling molecule, guanyl-nucleotide exchange factor                      |
| KCNQ2    | voltage-gated potassium channel, voltage-gated ion channel                 |
| KCNQ3    | voltage-gated potassium channel, voltage-gated ion channel                 |
| KIF5A    | microtubule binding motor protein                                          |
| KIF5C    | microtubule binding motor protein                                          |
| KITLG    | growth factor, membrane-bound signaling molecule, cell adhesion molecule   |
| LAMB2    | receptor, extracellular matrix linker protein                              |
| LLGL1    | membrane trafficking regulatory protein                                    |
| LPPR4    |                                                                            |
| MAP1B    | non-motor microtubule binding protein                                      |
| MAP1S    | non-motor microtubule binding protein                                      |
| MAP2     |                                                                            |
| MAP4K4   |                                                                            |
| MAPK1    | non-receptor serine/threonine protein kinase                               |
| MAPK8IP3 | kinase modulator                                                           |
| MEF2C    |                                                                            |

|          |                                                                           |
|----------|---------------------------------------------------------------------------|
| MYCBP2   |                                                                           |
| MYH10    | G-protein modulator, actin-binding motor protein, cell junction protein   |
| MYL12B   | actin family cytoskeletal protein, calmodulin                             |
| MYO10    | G-protein modulator, actin-binding motor protein, cell junction protein   |
| NCAM1    | immunoglobulin receptor superfamily, protein phosphatase, immunoglobulin  |
| NEDD4    | ubiquitin-protein ligase                                                  |
| NF1      | signaling molecule, G-protein modulator                                   |
| NLGN3    | esterase, lipase                                                          |
| NRP1     | transporter, apolipoprotein, membrane-bound signaling molecule, receptor, |
| NRXN1    | transporter, apolipoprotein, membrane-bound signaling molecule, receptor, |
| NRXN3    | Transporter, apolipoprotein, membrane-bound signaling molecule, receptor, |
| NTRK2    |                                                                           |
| OGDH     |                                                                           |
| PBX3     | DNA-directed RNA polymerase                                               |
| PDGFB    | growth factor                                                             |
| PGRMC1   | signaling molecule, receptor                                              |
| PHGDH    | dehydrogenase                                                             |
| PIP5K1C  | kinase                                                                    |
| PLXNA2   | tyrosine protein kinase receptor, signaling molecule, protein kinase      |
| PLXNB1   |                                                                           |
| PLXND1   | tyrosine protein kinase receptor, signaling molecule, protein kinase      |
| PPP5C    | protein phosphatase, calcium-binding protein                              |
| PPT1     | esterase                                                                  |
| PREX2    | guanyl-nucleotide exchange factor                                         |
| PRICKLE2 | structural protein, actin family cytoskeletal protein                     |
| PSMA5    |                                                                           |
| PSMA7    |                                                                           |
| PSMB2    |                                                                           |
| PSMD11   |                                                                           |
| PSMD13   | enzyme modulator                                                          |
| PSMD3    | enzyme modulator                                                          |
| PSMD6    |                                                                           |
| PSME3    |                                                                           |
| PSME4    |                                                                           |
| PSMF1    | protease inhibitor                                                        |
| PTEN     | protein phosphatase                                                       |
| PTK2     | non-receptor tyrosine protein kinase                                      |
| PTK2B    | non-receptor tyrosine protein kinase                                      |
| PTPN11   | protein phosphatase                                                       |
| PTPRF    | protein phosphatase                                                       |
| RAB10    |                                                                           |
| RAB11A   |                                                                           |
| RAC1     | small GTPase                                                              |
| RAC3     | small GTPase                                                              |

|         |                                                           |
|---------|-----------------------------------------------------------|
| RAPGEF2 | guanyl-nucleotide exchange factor                         |
| RASA3   | signaling molecule, G-protein modulator                   |
| RASGRF1 | guanyl-nucleotide exchange factor                         |
| RBFOX2  | RNA binding protein                                       |
| RELN    |                                                           |
| RERE    |                                                           |
| RTN4    | membrane traffic protein                                  |
| RTN4R   | cytokine, receptor, extracellular matrix protein          |
| SHANK1  |                                                           |
| SHANK3  |                                                           |
| SNAPIN  |                                                           |
| SOS2    | guanyl-nucleotide exchange factor                         |
| SPRED1  | receptor                                                  |
| SPTAN1  | non-motor actin-binding protein                           |
| SPTBN1  | non-motor actin-binding protein                           |
| SRGAP2  | G-protein modulator                                       |
| SYNGAP1 | signaling molecule, G-protein modulator                   |
| TBC1D24 | G-protein modulator                                       |
| TLN1    | actin family cytoskeletal protein, cell adhesion molecule |
| TNIK    |                                                           |
| TRIM32  |                                                           |
| ULK1    | non-receptor serine/threonine protein kinase              |
| ULK2    | non-receptor serine/threonine protein kinase              |
| UNC5A   | receptor                                                  |
| USP9X   |                                                           |
| VEGFA   | growth factor                                             |
| WNK1    | non-receptor serine/threonine protein kinase              |
| XBP1    |                                                           |
| YWHAB   | chaperone                                                 |

**Table S4.** List of primers used in molecular cloning.

| Name           | Sequence                                          |
|----------------|---------------------------------------------------|
| Luc-5'UTR F    | 5'-ATGCCTCGAGCTTTGGGTGGTGGCTGCT-3'                |
| Luc-5'UTR R    | 5'-ATGCGCGGCCGCTTGATGGCCTGCATCTGG-3'              |
| Luc-3'UTR F    | 5'-ATGCCTCGAGCCCTCGTTCTCGGTCCTG-3'                |
| Luc-3'UTR R    | 5'-<br>ATGCGCGGCCGCTTCATACATGCAAAACATACTGC-<br>3' |
| Luc-3'UTR R1   | 5'-ATGCGCGGCCGC GAGCAAGAATGGGGGATTTT-<br>3'       |
| Luc-3'UTR F2   | 5'-ATGCCTCGAGCCCTCGTTCTCGGTCCTG-3'                |
| Luc-3'UTR R2   | 5'-ATGCGCGGCCGCGTCACACGGTCTGGGAACTC-<br>3'        |
| Luc-3'UTR F3   | 5'-ATGCCTCGAGAGCACAGCCTCCTTAATGACA-3'             |
| Luc-3'UTR R3   | 5'- ATGCGCGGCCGCCATTTGTCACCTACTGTTTG-3'           |
| Luc-3'UTR F4   | 5'-ATGCCTCGAGCGATCTTATCAGTGTCTCTTGAG-<br>3'       |
| Luc-CDS F      | 5'-ATGCCTCGAG AGGCCATCAAGTGTGTGGTGGT-<br>3'       |
| Luc-CDS R      | 5'-<br>ATGCGCGGCCGCCAACAGCAGGCATTTTCTCTTC-3'      |
| TransL-3'UTR F | 5'-ATGCGCGGCCGC CCCTCGTTCTCGGTCCTG-3'             |
| TransL-3'UTR R | 5'-ATGCCTTAAGTTCATACATGCAAAACATACTGC-<br>3'       |

F - forward primers

R - reverse primers

**Table S5.** List of primers used for RT-PCR analysis.

| <b>Name</b> | <b>Sequence</b>              |
|-------------|------------------------------|
| HDAC6 F     | 5'-CTCGGAGTTTCAGCCTCAAC-3'   |
| HDAC6R      | 5'-AGCACTGACTCCCTTAGCCA-3'   |
| PSD95F      | 5'-GAGTGACAGCTATGCTCCCC-3'   |
| PSD95R      | 5'-ATGAAGATGCCTTCACCGTC-3'   |
| Rac1F       | 5'-GTACATCCCCACCGTCTTTG-3'   |
| Rac1R       | 5'-ACAGTGGTGTGCGCACTTCAG-3'  |
| CamKII F    | 5'-AAAGTGCGCAAACAGGAAAT-3'   |
| CamKII R    | 5'-AGGTGGATGTGAGGGTTCAG-3'   |
| Map1b       | 5'-TGGGACACAAACCTGATTGA-3'   |
| Map1b       | 5'-TGAAAATCTCTATGAAGTTCT-3'  |
| mTOR        | 5'-GCAAGTTCAGCCCTTCTTTG-3'   |
| mTOR        | 5'-GTACCACTGAGGCTTCTGCAT-3'  |
| GluR1F      | 5'-CTAGGCTGCCTGAACCTTTG-3'   |
| GluR1R      | 5'-GGGAAGATTGAATGGAAGCA-3'   |
| GAPDH F     | 5'-GGTCATCCATGACAACCTTTGG-3' |
| GAPDH R     | 5'-TCTTACTCCTTGGAGGCCATG-3'  |

**Table S6.** List of primers used to generate T7 promoter-tagged DNA templates for *in vitro* transcription.

| Name            | Sequence                                                         |
|-----------------|------------------------------------------------------------------|
| Rac1 5'UTR-F    | 5'-ATGCATTAATACGACTCACTATAGGG<br>CTTTGGGTGGTGGCTGCT-3'           |
| Rac1 5'UTR-R    | 5'-TTGATGGCCTGCATCTGG-3'                                         |
| Rac1 3'UTR-1F   | 5'-ATGCATTAATACGACTCACTATAGGG<br>GGAACCTTTGTACGCTTTC-3'          |
| Rac1 3'UTR-1R   | 5'-GAGCAAGAATGGGGGATTTT-3'                                       |
| Rac1 3'UTR-2F   | 5'-ATGCATTAATACGACTCACTATAGGG<br>CCCTCGTTCTCGGTCTG-3'            |
| Rac1 3'UTR-2R   | 5'-GTCACACGGTCTGGGAAGTC-3'                                       |
| Rac1 3'UTR-3F   | 5'-ATGCATTAATACGACTCACTATAGGG<br>GACACAGCACAGCCTCCTTA-3'         |
| Rac1 3'UTR-3R   | 5'-ATCGGCCATTTGTCACCTAC-3'                                       |
| Rac1 3'UTR-4F   | 5'-<br>ATGCATTAATACGACTCACTATAGGGCGAT<br>CTTATCAGTGTCTCTTGAGC-3' |
| Rac1 3'UTR-4R   | 5'-TTCATACATGCAAACATACTGC-3'                                     |
| Rac1 3'UTR-3F1  | 5'-<br>ATGCATTAATACGACTCACTATAGGGGAGCA<br>CAGCCTCCTTAATGACA-3'   |
| Rac1 3'UTR-3R1  | 5'-GCCATTTGTACCTACTGTTTG-3'                                      |
| Rac1 3'UTR-2MR  | 5'-TTAGTTCAGAAGGTATTTTGGC -3'                                    |
| Rac1 3'UTR-2MF  | 5'-CTTCTGAACTAAATTCGCTCTTCGG -3'                                 |
| Rac1 3'UTR-3M1R | 5'-AGGAACCAGAGTTCTGTTCAA-3'                                      |
| Rac1 3'UTR-3M1F | 5'- GAACTCTGGTTCGGCGATCC-3'                                      |
| Rac1 3'UTR-3MR  | 5'-CAGCAAACCGAGAAGTAGGAA-3'                                      |
| Rac1 3'UTR-3MF  | 5'-GCTGGGTGGAGTGGGAAAC-3'                                        |
| Rac1 3'UTR-3M2R | 5'-TCATTGTGACGTACAGTACAAAGTTAC-3'                                |
| Rac1 3'UTR-3M2F | 5'-CACAAATGATAAGCGTGACAGC-3'                                     |
| Rac1 CDS F      | 5'-<br>ATGCATTAATACGACTCACTATAGGGCCAG<br>ATGCAGGCCATCAAG-3'      |
| Rac1 CSM F      | 5'-<br>ATGCATTAATACGACTCACTATAGGGAGTG<br>AGAAATGGTGGGAGACG-3'    |
| Rac1 CDS R      | 5'-GAAGAGAAAATGCCTGCTGTTG-3'                                     |
